# Supplementary material for: Analysis of the Lifestyle of Spanish Undergraduate Nursing Students and Comparison with Students of Other Degrees
Source: MDPI journal article supplement (doi:10.3390/ijerph19095765), 2022-05-09
Supplement: s1 [file s1]

## LIFESTYLE PRACTICES AND HEALTH BELIEFS QUESTIONNAIRE

The following questionnaire aims to assess practices and beliefs related to healthy lifestyle. Put an "x" in the box that best describes your behavior. Answer truthfully. There are no right or wrong answers.

|                                                                                                    |
|----------------------------------------------------------------------------------------------------|
| Sexo: Male ___ Female ___                                                                          |
| Your age is between: 18-20 ___ 21-25 ___ 26-30 ___ >30                                             |
| Degree:                                                                                            |
| Course: 1º ___ 2º ___ 3º ___ 4º ___                                                                |
| Your weight is between: 40-50 ___ 51-60 ___ 61-70 ___ 71-80 ___ 81-90 ___ More than 90 ___         |
| Your height is between: 1.50-1.60 ___ 1.61-1.70 ___ 1.71-1.80 ___ 1.81-1.90 ___ More than 1.90 ___ |

### A.- PHYSICAL EXERCISE: PRACTICES

|                                                                                                                                                                    |
|--------------------------------------------------------------------------------------------------------------------------------------------------------------------|
| 1 - Do you exercise, walk or play sports?: YES ___ NO ___                                                                                                          |
| 2 - Do you have time to do sport: YES ___ NO ___                                                                                                                   |
| 3 - Approximately how many days a week do you do sport?:                                                                                                           |
| 1 a 2 days <input type="checkbox"/> 3 days <input type="checkbox"/> 4 <input type="checkbox"/> 5 or more <input type="checkbox"/>                                  |
| 4 - Approximately how many hours a day do you do it?:                                                                                                              |
| 30 minutes <input type="checkbox"/> 30 minutes to 1 hour <input type="checkbox"/> 1 to 2 hours <input type="checkbox"/> More than 2 hours <input type="checkbox"/> |
| 5 - Does it keep your body weight stable?: YES ___ NO ___                                                                                                          |
| 6 - I go to university: walking ___ by car ___ by Public transport ___                                                                                             |

### B.- EATING HABITS: PRACTICES

|                                                                                               |
|-----------------------------------------------------------------------------------------------|
| 7 - I drink between 4 and 8 glasses of water a day.: YES ___ NO ___                           |
| 8 - I eat sweets, ice cream, cakes more than 2 times a week: YES ___ NO ___                   |
| 9 - I eat less than 2 rations of fruit per day.: YES ___ NO ___                               |
| 10 - I eat less than 1 ration of vegetables per day: YES ___ NO ___                           |
| 11- I eat 2 or more rations of meat products per day: YES ___ NO ___                          |
| 12 - I consume less than 3 servings of milk/derivatives per day: YES ___ NO ___               |
| 13 - I eat 2 or more rations of pastries per day: YES ___ NO ___                              |
| 14 - I eat salty snacks (crisps, chips, snacks...) 2 or more rations per week: YES ___ NO ___ |
| 15 - In the last 12 months I have been on a weight loss diet.: YES ___ NO ___                 |
| 16 - I go to university without breakfast: YES ___ NO ___                                     |

**C.- USE OF TOBACCO, ALCOHOL AND OTHER DRUGS: PRACTICES****17** - I have ever smoked: **YES** \_\_\_ **NO** \_\_\_**18** - I currently smoke: **YES** \_\_\_ **NO** \_\_\_**19** - Number of cigarettes per day: \_\_\_\_\_**20** - I allow smoking in my presence: **YES** \_\_\_ **NO** \_\_\_**21** - Have I ever had any of the following drinks:

|                   | YES | NO |
|-------------------|-----|----|
| BEER              |     |    |
| WINE              |     |    |
| SPIRITS OR MIXERS |     |    |

**22** - How often do you currently drink alcoholic beverages??

|                   | All days | All weeks | All month | Less than once a month | Never |
|-------------------|----------|-----------|-----------|------------------------|-------|
| BEER              |          |           |           |                        |       |
| WINE              |          |           |           |                        |       |
| SPIRITS OR MIXERS |          |           |           |                        |       |

**23** - At what age do you remember having your first drink of any alcoholic beverage?: \_\_\_\_\_**24**- Have you ever drank so much that you got drunk?:**yes, 1 time:** \_\_\_\_\_ **Yes, 4-10 times:** \_\_\_\_\_**Yes, 2-3 times:** \_\_\_\_\_ **Yes, more than 10 times:** \_\_\_\_\_**25** - Have you ever taken these drugs??

|                                | 3 times or more | 1 or 2 times | Never |
|--------------------------------|-----------------|--------------|-------|
| Hashish, joints-marijuana      |                 |              |       |
| Solvent glues                  |                 |              |       |
| Cocaine                        |                 |              |       |
| Heroin, morphine, opium        |                 |              |       |
| LSD                            |                 |              |       |
| Medicines or pills to get high |                 |              |       |

**D.- SEXUAL RELATIONS: PRACTICES****26** - At what age did you have your first sexual intercourse?: \_\_\_\_\_**27** - I have a steady partner: **YES** \_\_\_ **NO** \_\_\_**28** - I use contraception in sexual intercourse with my regular partner: **YES** \_\_\_ **NO:** \_\_\_\_\_**29** - I use contraception in sexual intercourse with NON-stable partners: **YES** \_\_\_ **NO** \_\_\_**30** - I know about sexually transmitted diseases: **YES** \_\_\_ **NO** \_\_\_**31** - I use the morning-after pill if I do not use another method of contraception: **YES** \_\_\_ **NO** \_\_\_**32** - Considero haber tenido alguna vez relaciones de riesgo: **YES** \_\_\_ **NO** \_\_\_

**E.- ROAD SAFETY: PRACTICES**

|                                                                                                    |
|----------------------------------------------------------------------------------------------------|
| 33 - If I get on a motorbike, I wear a helmet: YES ___ NO ___                                      |
| 34 - If I get into a car as a driver or co-driver, I wear my seatbelt: YES ___ NO ___              |
| 35 - I have ever driven under the influence of alcohol/drugs: YES ___ NO ___                       |
| 36 - I have ever ridden with someone in a car under the influence of alcohol/drugs: YES ___ NO ___ |
| 37 - I have ever driven with excessive speed: YES ___ NO ___                                       |
| 38 - I have ever driven while using my mobile phone at the same time: YES ___ NO ___               |

**A.- PHYSICAL EXERCISE: BELIEFS**

|                                                                        |
|------------------------------------------------------------------------|
| 39 - Physical activity helps to improve health: YES ___ NO ___         |
| 40 - Exercising can prevent some diseases: YES ___ NO ___              |
| 41 - Exercise improves mood: YES ___ NO ___                            |
| 42 - Physical exercise is useless: YES ___ NO ___                      |
| 43 - Physical exercise is boring: YES ___ NO ___                       |
| 44 - Since I have been exercising I have more vitality: YES ___ NO ___ |

**B.- EATING HABITS: BELIEFS**

|                                                                                 |
|---------------------------------------------------------------------------------|
| 45 - How much slimmer the more healthy you are: Agreed ___ Disagree ___         |
| 46 - The most important thing is the body shape: Agreed ___ Disagree ___        |
| 47 - Water is important for health: Agreed ___ Disagree ___                     |
| 48 - A good diet is important for studying performance: Agreed ___ Disagree ___ |
| 49 - Fast food makes better use of time: Agreed ___ Disagree ___                |

**C.- USE OF TOBACCO, ALCOHOL AND OTHER DRUGS: BELIEFS**

|                                                                                    |
|------------------------------------------------------------------------------------|
| 50 - I would like to stop smoking: YES ___ NO ___                                  |
| 51 - I would ask for help from health services to stop smoking: YES ___ NO ___     |
| 52 - Drinking alcohol is normal in social relationships: YES ___ NO ___            |
| 53 - Drinking alcohol is fun: YES ___ NO ___                                       |
| 54 - I consider illegal drugs to be easily accessible: YES ___ NO ___              |
| 55 - I consider that I have enough information about illegal drugs: YES ___ NO ___ |

**D.- SEXUAL RELATIONS: BELIEFS**

|                                                                                            |
|--------------------------------------------------------------------------------------------|
| 56 - Condoms are the best method of contraception: YES ___ NO ___                          |
| 57 - Condoms are very uncomfortable: YES ___ NO ___                                        |
| 58 - Condoms prevent AIDS/STDs/unwanted pregnancies: YES ___ NO ___                        |
| 59 - The morning-after pill is just like any other normal method of contraception: YES ___ |

|                                                                                                              |
|--------------------------------------------------------------------------------------------------------------|
| NO ____                                                                                                      |
| 60 - It is better to enjoy sex without any method of contraception: YES ____ NO ____                         |
| 61 - I have good information about sex in terms of STD/STD/unwanted pregnancy prevention<br>YES ____ NO ____ |

|                                 |
|---------------------------------|
| <b>E.- ROAD SAFETY: BELIEFS</b> |
|---------------------------------|

|                                                                             |
|-----------------------------------------------------------------------------|
| 62 - Traffic accidents can be avoided: YES ____ NO ____                     |
| 63 - I see traffic accidents as a health and life problem: YES ____ NO ____ |
| 64 - Drugs do not affect driving: YES ____ NO ____                          |
